# Supplementary material for: Mimicking the Physicochemical Properties of the Cornea: A Low-Cost Approximation Using Highly Available Biopolymers
Source: MDPI journal article supplement (doi:10.3390/polym16081118), 2024-04-17
Supplement: s1 [file s1]

## Supplementary Material

| <b>Page</b> |       | <b>Description</b> |
|-------------|-------|--------------------|
| S1          | ..... | This page          |
| S2          | ..... | Table S1           |
| S3          | ..... | Figure S1          |
| S4          | ..... | Figure S2          |
| S5          | ..... | Figure S3          |
| S6          | ..... | Figure S4          |
| S6          | ..... | Figure S5          |

**Table S1.** Initial established formulation combinations for hydrogel preparation.

| <b>Formulation number</b> | <b>Gelatin (G) %</b> | <b>Chitosan (C) %</b> | <b>Poly-D-Lysine (P) %</b> | <b>Glutaraldehyde %</b> |
|---------------------------|----------------------|-----------------------|----------------------------|-------------------------|
| 1                         | 1.0                  | 1.0                   | 0.0                        | 0.02                    |
| 2                         | 1.0                  | 1.0                   | 0.0                        | 0.05                    |
| 3                         | 1.0                  | 1.0                   | 0.0                        | 0.00                    |
| 4                         | 1.0                  | 0.0                   | 1.0                        | 0.02                    |
| 5                         | 1.0                  | 0.0                   | 1.0                        | 0.05                    |
| 6                         | 1.0                  | 0.0                   | 1.0                        | 0.00                    |
| 7                         | 1.0                  | 1.0                   | 1.0                        | 0.02                    |
| 8                         | 1.0                  | 1.0                   | 1.0                        | 0.05                    |
| 9                         | 1.0                  | 1.0                   | 1.0                        | 0.00                    |
| 10                        | 2.0                  | 1.0                   | 0.0                        | 0.02                    |
| 11                        | 2.0                  | 1.0                   | 0.0                        | 0.05                    |
| 12                        | 2.0                  | 1.0                   | 0.0                        | 0.00                    |
| 13                        | 2.0                  | 0.0                   | 1.0                        | 0.02                    |
| 14                        | 2.0                  | 0.0                   | 1.0                        | 0.05                    |
| 15                        | 2.0                  | 0.0                   | 1.0                        | 0.00                    |
| 16                        | 2.0                  | 1.0                   | 1.0                        | 0.02                    |
| 17                        | 2.0                  | 1.0                   | 1.0                        | 0.05                    |
| 18                        | 2.0                  | 1.0                   | 1.0                        | 0.00                    |

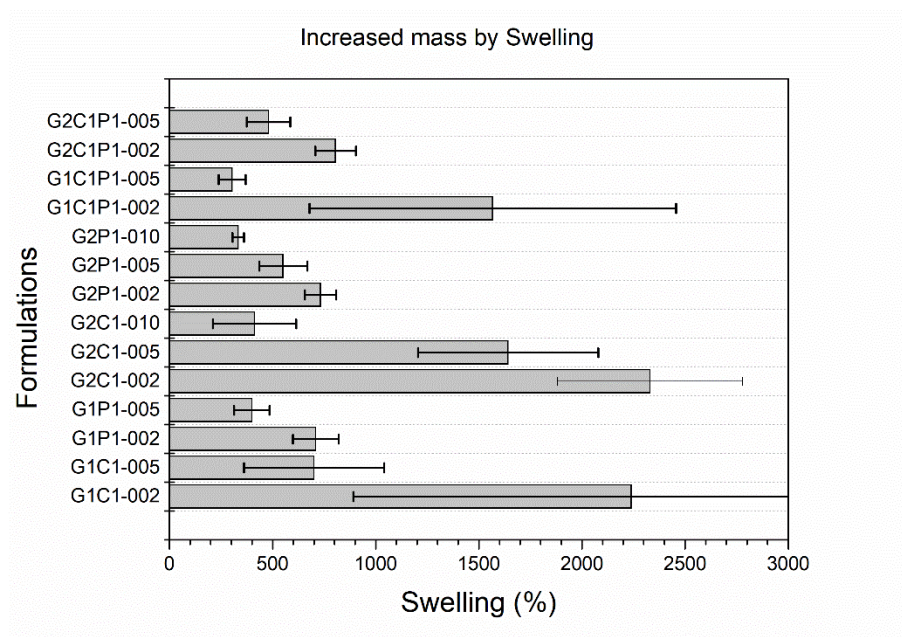

**Figure S1.** Swelling of non-selected formulations.

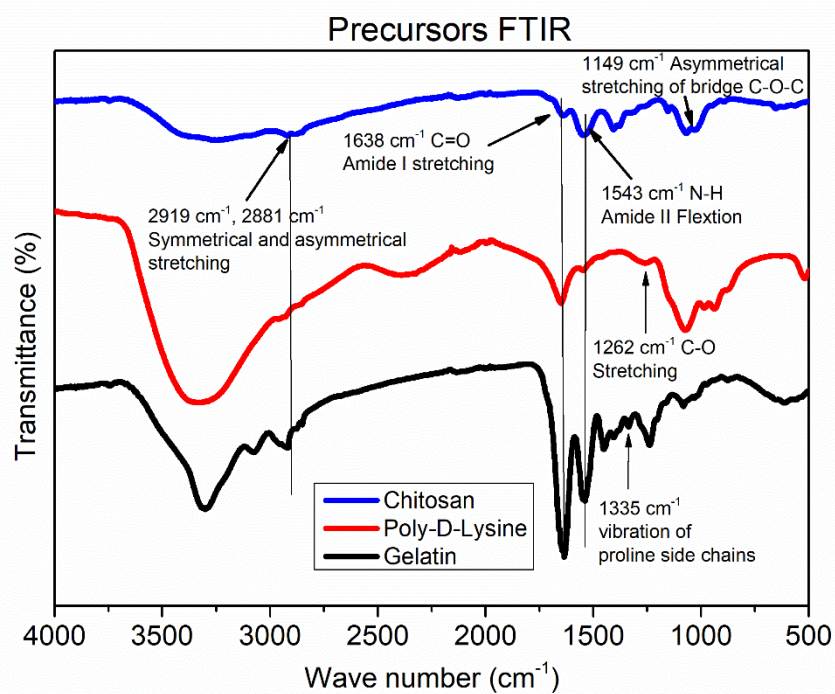

**Figure S2.** FTIR spectra of formulations' precursors.

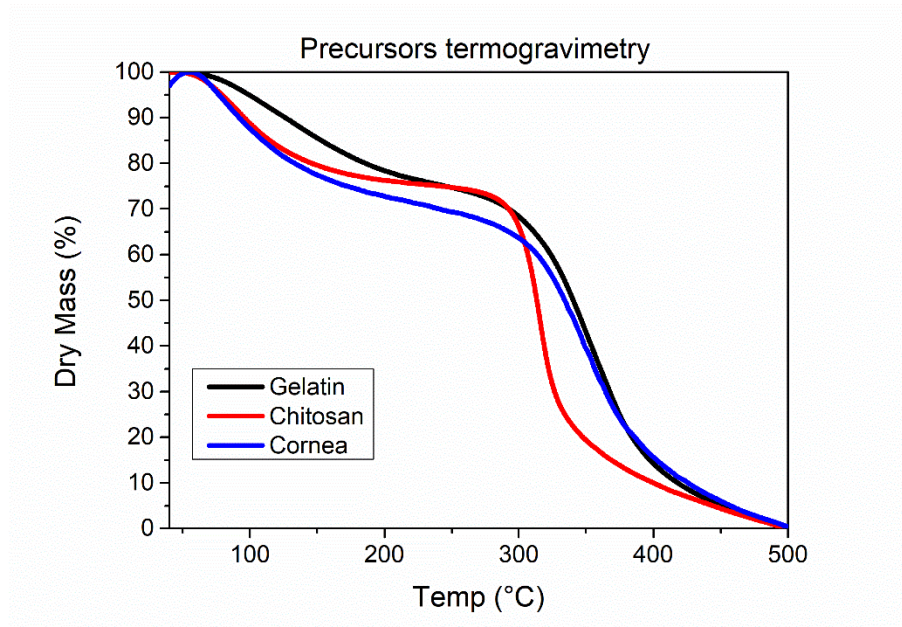

**Figure S3.** Thermogravimetric analysis of formulations' precursors.

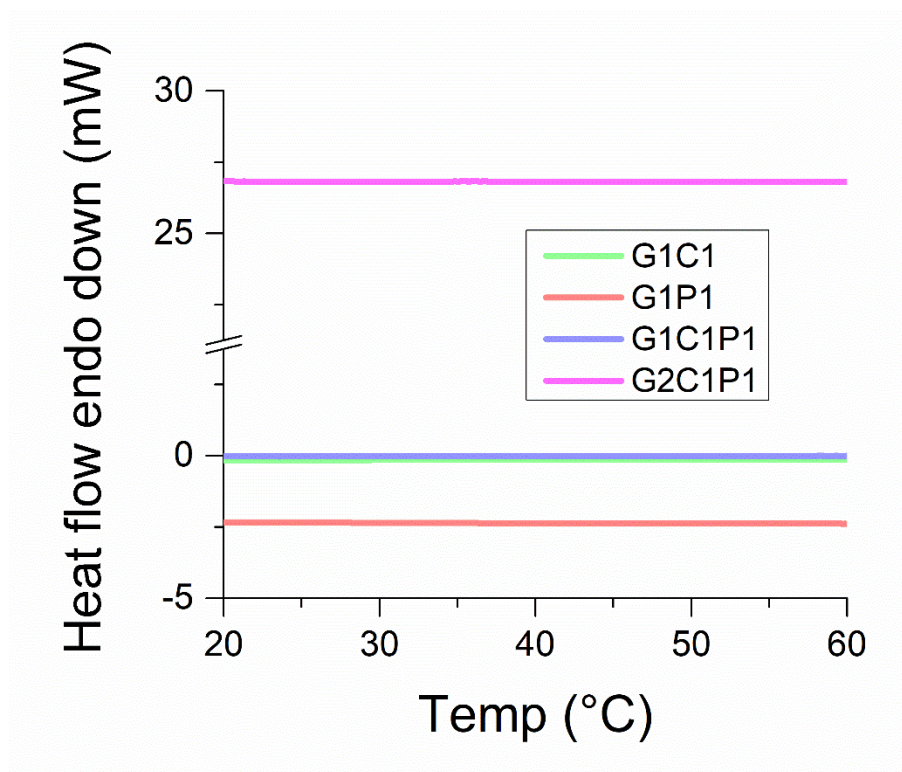

**Figure S4.** DSC results were obtained for the samples considering the range between 15 and 60 °C.

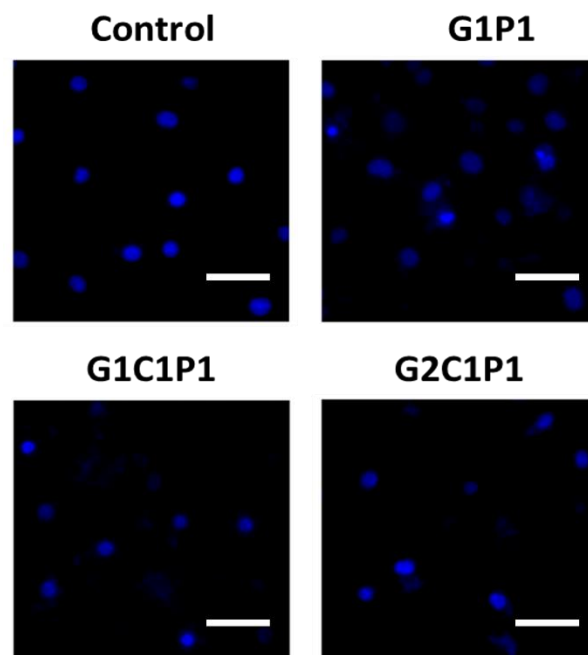

**Figure S5.** Representative microscopy images of NIH/3T3 fibroblasts stained with DAPI after 72 h exposure to the hydrogel formulations. Scale bars: 150 μm.
